# Supplementary material for: Integration of Stable Ionic Liquid-Based Nanofluids into Polymer Membranes. Part I: Membrane Synthesis and Characterization
Source: PubMed Central journal article supplement (PMC7997425; doi:10.3390/nano11030607), 2021-02-28
Supplement: nanomaterials-11-00607-s001.pdf [file nanomaterials-11-00607-s001.pdf]

# Supplementary Materials

## Integration of Stable Ionic Liquid-Based Nanofluids into Polymer Membranes. Part I: Membrane Synthesis and Characterization

Carolina Hermida-Merino <sup>1</sup>, Fernando Pardo <sup>2</sup>, Gabriel Zarca <sup>2</sup>, João M. M. Araújo <sup>3</sup>, Ane Urriaga <sup>2</sup>, Manuel M. Piñeiro <sup>1</sup> and Ana B. Pereiro <sup>3,\*</sup>

- <sup>1</sup> Centro de Investigaciones Biomédicas (CINBIO), Department of Applied Physics, University of Vigo, E36310, Vigo, Spain; cahermida@uvigo.es (C.H.-M.) and mmpineiro@uvigo.es (M.M.P.)  
<sup>2</sup> Department of Chemical and Biomolecular Engineering, Universidad de Cantabria, 39005 Santander, Spain; pardof@unican.es (F.P.); zarcag@unican.es (G.Z.); urriaga@unican.es (A.U.)  
<sup>3</sup> LAQV, REQUIMTE, Departamento de Química, Faculdade de Ciências e Tecnologia, Universidade Nova de Lisboa, 2829-516 Caparica, Portugal; jmmda@fct.unl.pt  
\* Correspondence: anab@fct.unl.pt; Tel.: (+351)-212-948-318

**Table S1.** Identification of bands corresponding to the graphene [S1-S3].

| Description                                          | Wavenumber (cm <sup>-1</sup> ) |
|------------------------------------------------------|--------------------------------|
| =CH <sub>2</sub> asymmetric and symmetric stretching | 2915 and 2850                  |
| C-H bond stretching and bending                      | 3783 and 672                   |
| C=C sp <sup>2</sup> bonds                            | 1618                           |
| Adsorption of CO <sub>2</sub> from air               | 2300                           |

**Table S2.** Identification of bands corresponding to the ionic liquid [S4,S5].

| Description                            | Wavenumber (cm <sup>-1</sup> ) |
|----------------------------------------|--------------------------------|
| C-H bond tension                       | 2850-3000                      |
| Pyridinium ring vibration              | 1600-1650                      |
| C=N bond tension, Pyridinium ring      | 1520-1450                      |
| CF <sub>2</sub> tension group          | 1240-1260                      |
| CF <sub>2</sub> tension group          | 1130                           |
| SO <sub>3</sub> tension group          | 1055, 1035, 1020               |
| Pyridinium ring tension                | 1000-1030                      |
| SO <sub>3</sub> flexion group          | 600-700                        |
| O=S=O flexion of SO <sub>3</sub> group | 520-530                        |

**Table S3.** Identification of bands corresponding to Pebax®1657 [S6].

| Composition          | N-H bond tension | O-H bonds tension | C-H bonds tension | C=O bonds tension | HNCO tension | N-H flexion | C-O-C bond tension |
|----------------------|------------------|-------------------|-------------------|-------------------|--------------|-------------|--------------------|
| Pebax                | 3296.5           | 3506              | 2850-3000         | 1731              | 1637         | 1542        | 1094               |
| Pebax/20IL           | 3295.7           | 3520              | 2850-3000         | 1731              | 1637         | 1543        | 1101               |
| Pebax/40IL           | 3297             | 3523              | 2850-3000         | 1731              | 1637         | 1543        | 1098               |
| Pebax/60IL           | 3298             | 3520              | 2850-3000         | 1731              | 1638         | 1543        | 1099               |
| Pebax/19.8IL/0.2xGnP | 3296             | 3520              | 2850-3000         | 1731              | 1637         | 1542        | 1100               |
| Pebax/18IL/0.2xGnP   | 3296             | 3519              | 2850-3000         | 1731              | 1637         | 1542        | 1097               |
| Pebax/16IL/4xGnP     | 3296             | 3520              | 2850-3000         | 1731              | 1637         | 1542        | 1094               |
| Pebax/32IL/8xGnP     | 3296.5           | 3521              | 2850-3000         | 1731              | 1637         | 1542        | 1094               |
| Pebax/48IL/12xGnP    | 3296.5           | 3520              | 2850-3000         | 1731              | 1637         | 1543        | 1097               |

<sup>1</sup> Values in cm<sup>-1</sup>

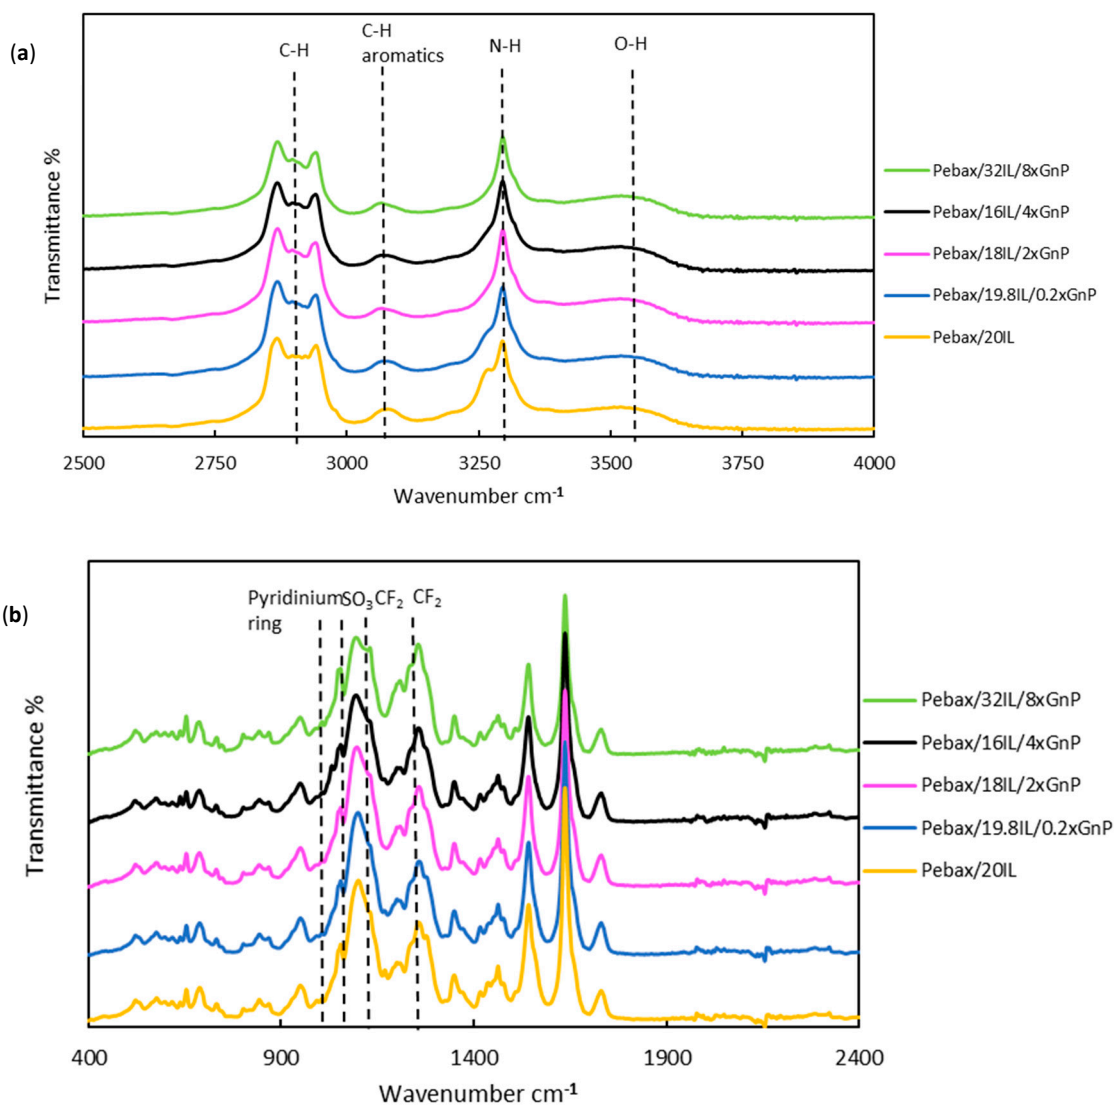

**Figure S1.** Comparison between CILPM Pebax/20IL and MMMs (full names in Table 1) with differences concentrations of IL and xGnP: a) range 2500-4000 $\text{cm}^{-1}$ , b) range 400-2400 $\text{cm}^{-1}$ .

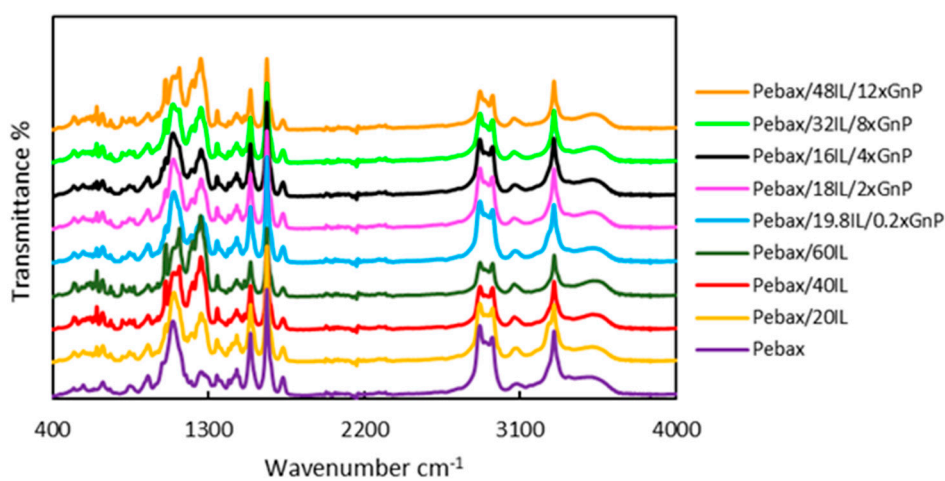

**Figure S2.** FTIR spectra of Pebax, Pebax/20IL, Pebax/40IL, Pebax/60IL, Pebax/19.8/IL/0.2xGnP, Pebax/18IL/2xGnP, Pebax/16IL/4xGnP, Pebax/32/8xGnP, and Pebax/48IL/12xGnP (full names in Table 1)

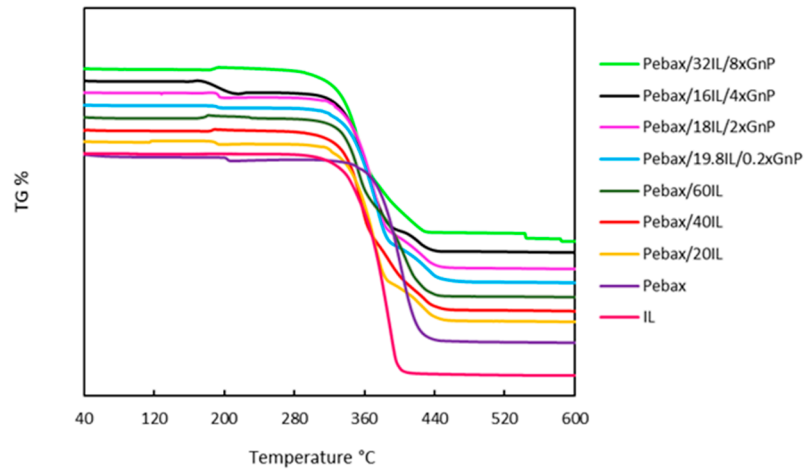

**Figure S3.** TGA Curves of IL, Pebax, Pebax/20IL, Pebax/40IL, Pebax/60IL, Pebax/19.8/IL/0.2xGnP, Pebax/18IL/2xGnP, Pebax/16IL/4xGnP, and Pebax/32/8xGnP (full names in Table 1).

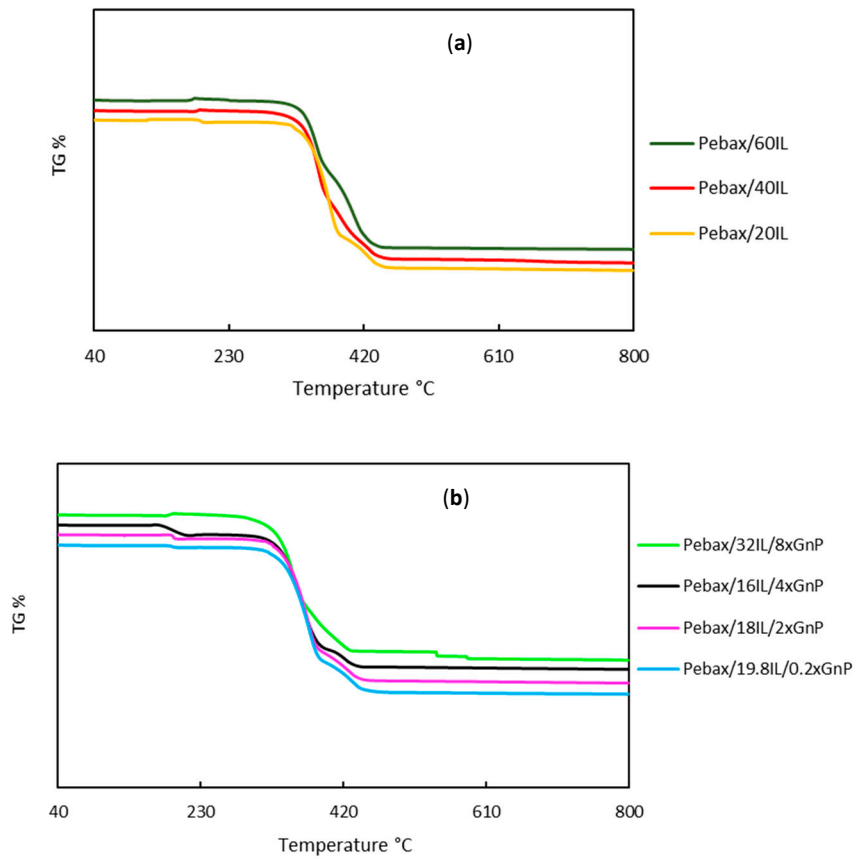

**Figure S4.** TGA Curves of a) CILPMs: Pebax/20IL, Pebax/40IL, and Pebax/60IL; and b) MMMs: Pebax/19.8/IL/0.2xGnP, Pebax/18IL/2xGnP, Pebax/16IL/4xGnP, and Pebax/32/8xGnP (full names in Table 1).

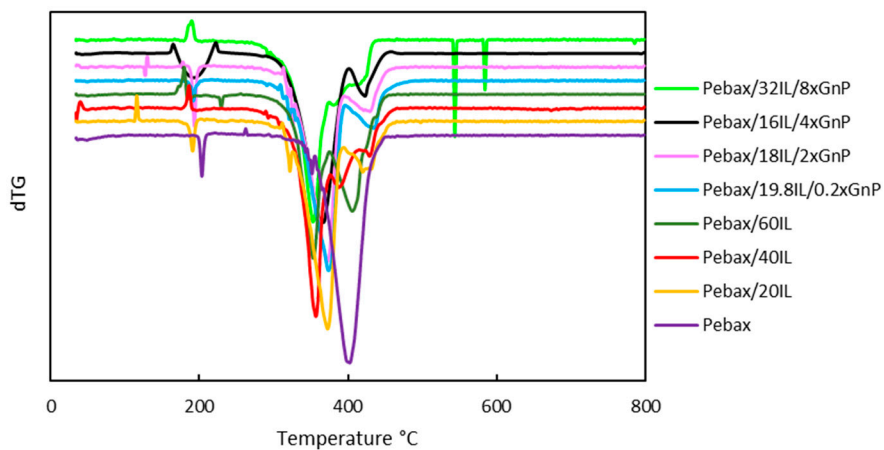

**Figure S5.** dTGA Curves of Pebax, Pebax/20IL, Pebax/40IL, Pebax/60IL, Pebax/19.8IL/0.2xGnP, Pebax/18IL/2xGnP, Pebax/16IL/4xGnP, and Pebax/32/8xGnP (full names in Table 1).

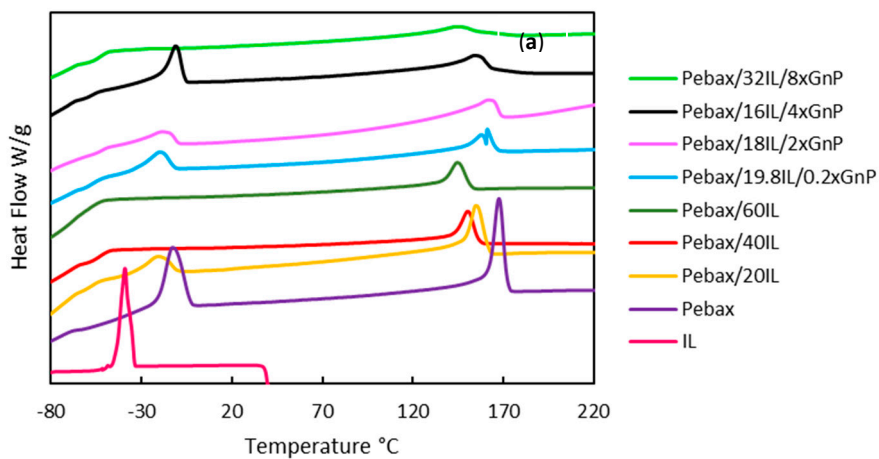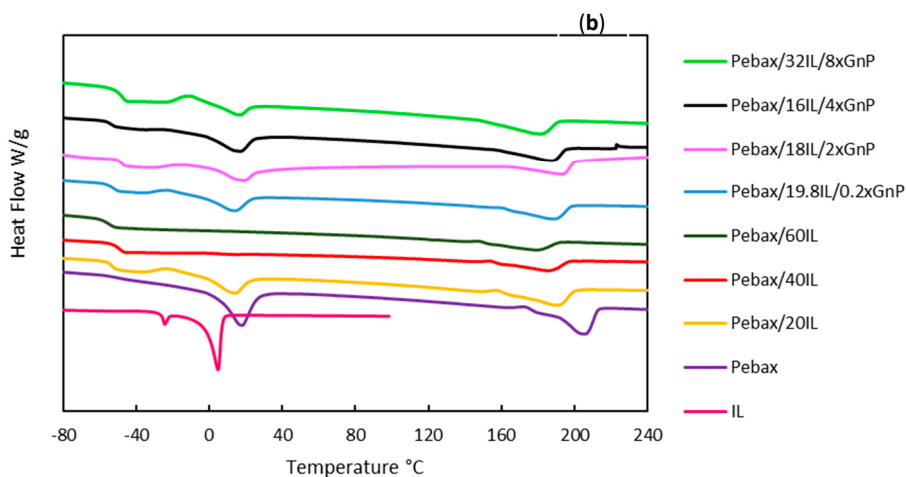

**Figure S6.** DSC Termograms of IL, Pebax, Pebax/20IL, Pebax/40IL, Pebax/60IL, Pebax/19.8IL/0.2xGnP, Pebax/18IL/2xGnP, Pebax/16IL/4xGnP, and Pebax/32/8xGnP at 10°C/min: (a) cooling ramp, (b) heating ramp.

|                          | <i>Face up</i>                                                                      | <i>Cross Section</i>                                                                 | <i>Face Down</i>                                                                      |
|--------------------------|-------------------------------------------------------------------------------------|--------------------------------------------------------------------------------------|---------------------------------------------------------------------------------------|
| <b>Pure Pebax</b>        |                                                                                     |                                                                                      |                                                                                       |
| Pebax                    | 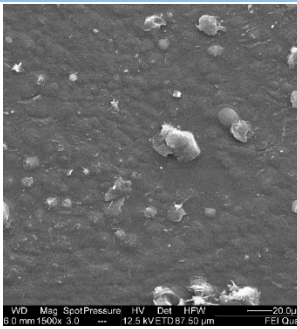   |    |    |
| <b>Three CILPMs</b>      |                                                                                     |                                                                                      |                                                                                       |
| Pebax/20IL               |    |    |    |
| Pebax/40IL               |   |   |   |
| Pebax/60IL               |  |  |  |
| <b>Five MMMs</b>         |                                                                                     |                                                                                      |                                                                                       |
| Pebax/19.8IL/<br>0.2xGnP |  |  |  |



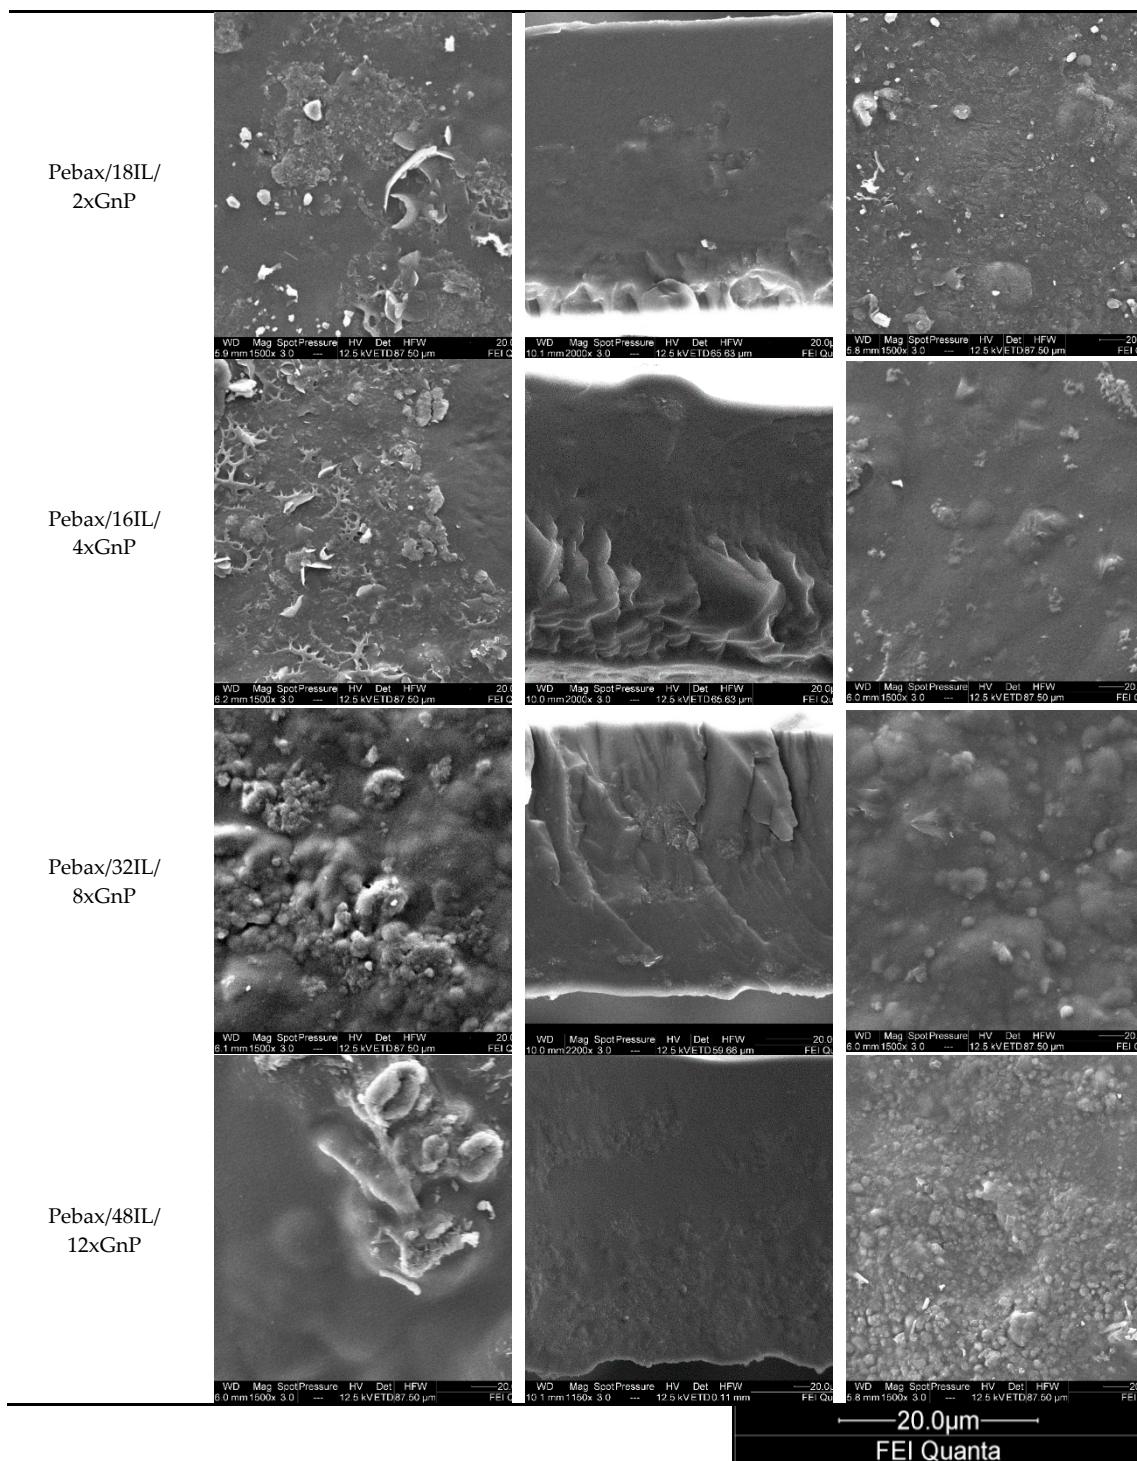

**Figure S7.** STEM images of Pebax, Pebax/20IL, Pebax/40IL, Pebax/60IL, Pebax/19.8IL/0.2xGnP, Pebax/18IL/2xGnP, Pebax/16IL/4xGnP, Pebax/32IL/8xGnP, and Pebax/48IL/12xGnP (full names in Table 1).

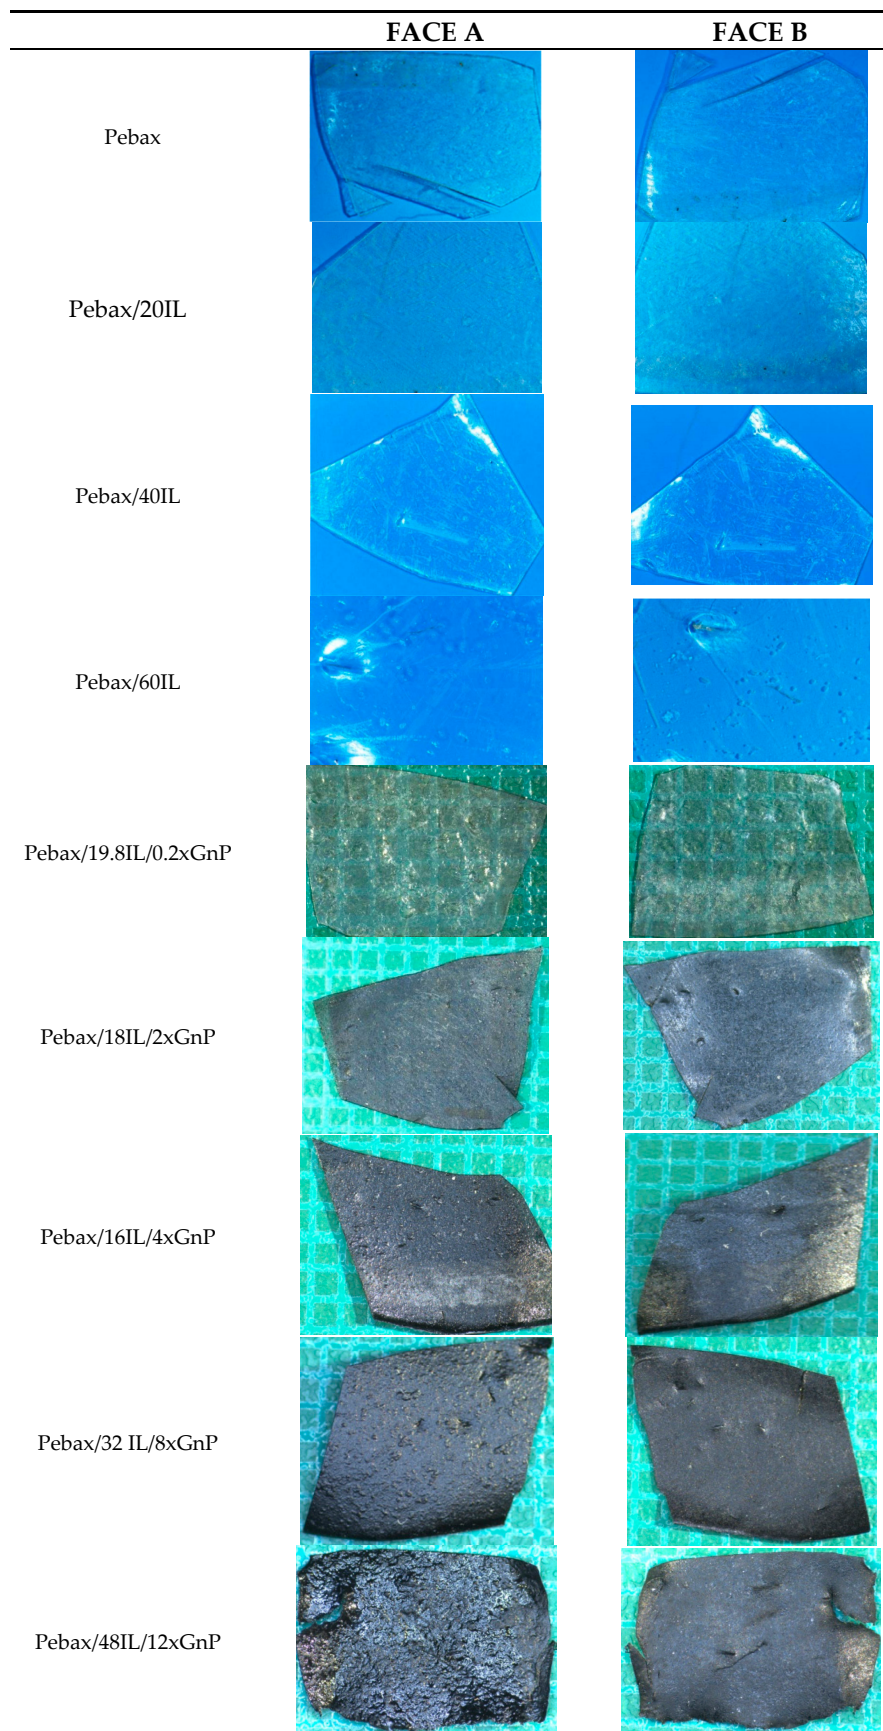

**Figure S8.** 2D imaging with optical reflection of Rough face A and face B of Pebax, Pebax/20IL, Pebax/40IL, Pebax/60IL, Pebax/19.8IL/0.2xGnP, Pebax/18IL/2xGnP, Pebax/16IL/4xGnP, Pebax/32IL/8xGnP, and Pebax/48IL/12xGnP (full names in Table 1).



Rough face

Smooth face

Pebax

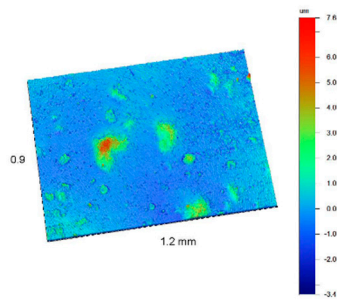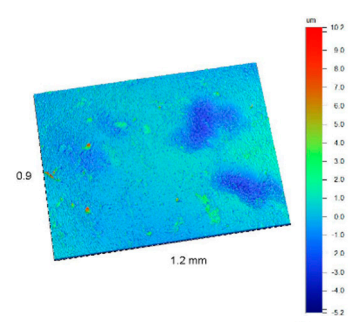

Pebax/20IL

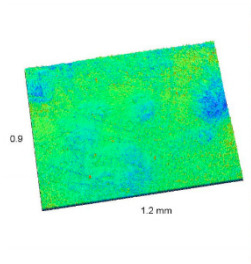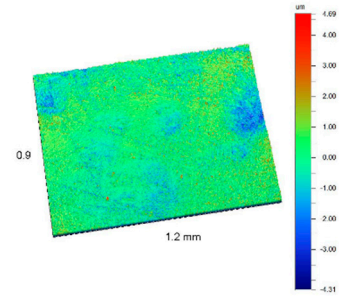

Pebax/40IL

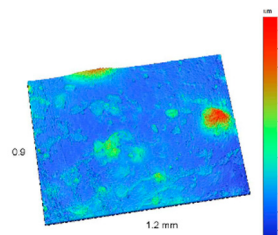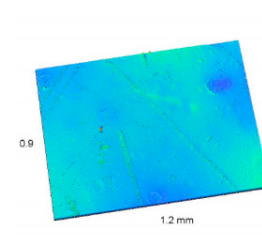

Pebax/60IL

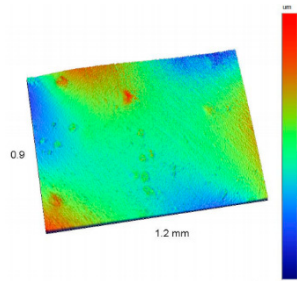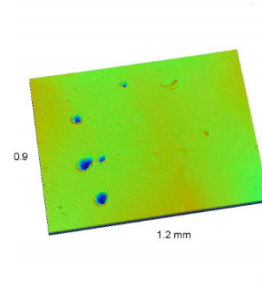

Pebax/19.8IL/0.2xGnP

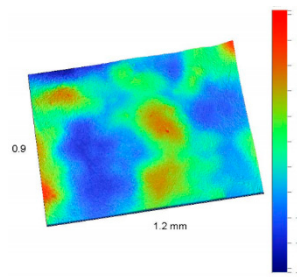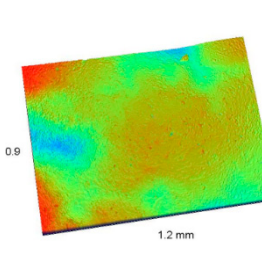

Pebax/18IL/2xGnP

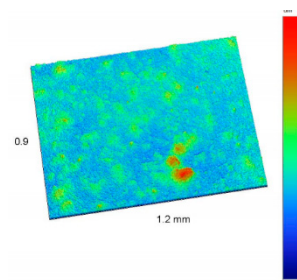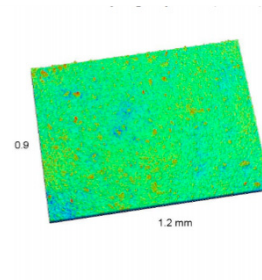



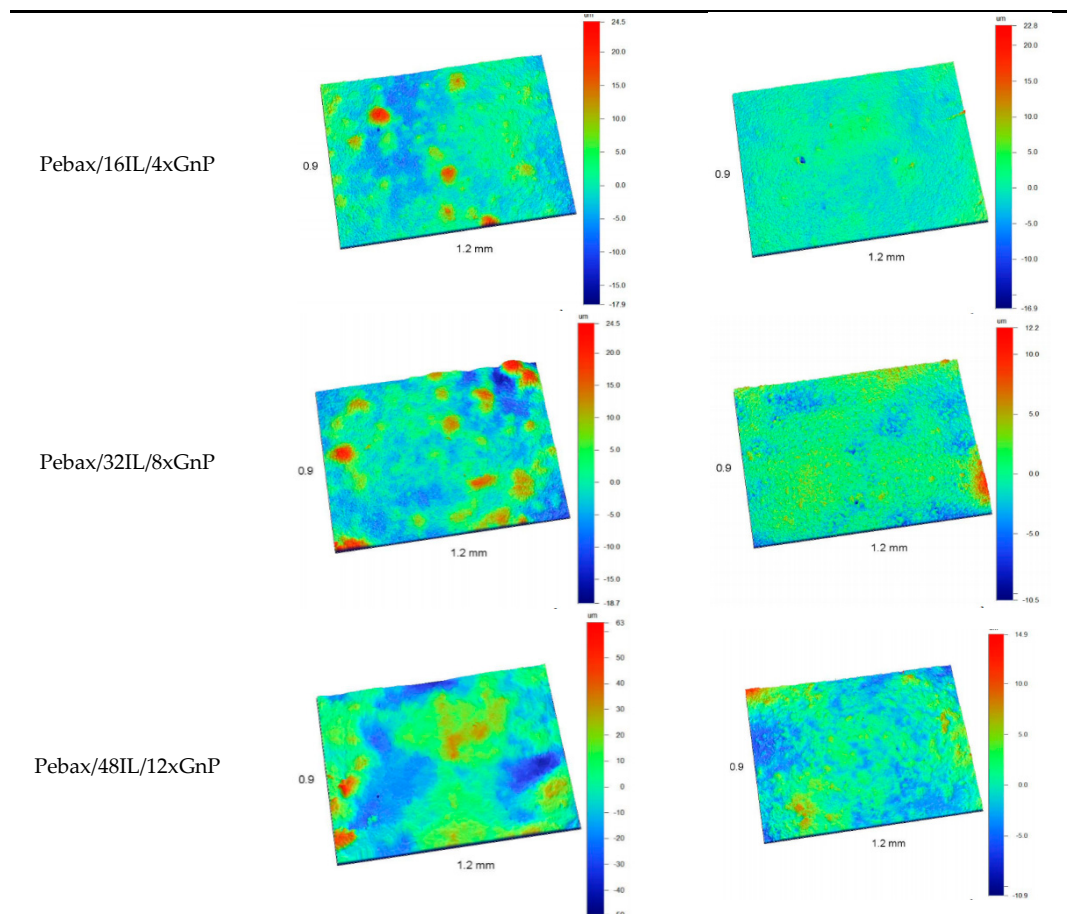

**Figure S9.** 3D imaging with topographic enhancement of Rough face and Smooth face of Pebax, Pebax/20IL, Pebax/40IL, Pebax/60IL, Pebax/19.8IL/0.2xGnP, Pebax/18IL/2xGnP, Pebax/16IL/4xGnP, Pebax/32IL/8xGnP, and Pebax/48IL/12xGnP (full names in Table 1).

## References

- S1. Yang, H.; Li, F.; Shan, C.; Han, D.; Zhang, Q.; Niu, L.; Ivaska, A. Covalent functionalization of chemically converted graphene sheets via silane and its reinforcement. *J. Mater Chem.* **2009**, *19*, 4632–4638.
- S2. Guo, H.-L.; Wang, X.-F.; Qian, Q.-Y.; Wang, F.-B.; Xia, X.-H. A Green Approach to the Synthesis of Graphene Nanosheets. *ACS Nano* **2009**, *3*, 2653–2659.
- S3. Marcano, D.C.; Kosynkin, D.V.; Berlin, J.M.; Sinitskii, A.; Sun, Z.; Slesarev, A.; Alemany, L.B.; Lu, W.; Tour, J.M. Improved Synthesis of Graphene Oxide. *ACS Nano* **2010**, *4*, 4806–4814.
- S4. Zhang, L.; Lin, Y.; Xu, S.; Li, R.; Zheng, X.; Zhang, F. Intercalation of perfluorobutane sulfonate into layered double hydroxides. *Applied Clay Science*. **2010**, *48*, 641–645
- S5. Zhang, K.; Huang, J.; Yu, G.; Zhang, Q.; Deng, S.; Wang, B. Destruction of Perfluorooctane Sulfonate (PFOS) and Perfluorooctanoic Acid (PFOA) by Ball Milling. *Environ. Sci. Technol.* **2013**, *47*, 6471–6477
- S6. Thanakkasaranee, S.; Kim, D.; Seo, J. Preparation and Characterization of Poly(ether-block-amide)/Polyethylene Glycol Composite Films with TemperatureDependent Permeation. *Polymers*. **2018**, *10*, 225
